# Supplementary material for: Nitrogen Starvation Differentially Influences Transcriptional and Uptake Rate Profiles in Roots of Two Maize Inbred Lines with Different NUE
Source: MDPI journal article supplement (doi:10.3390/ijms20194856), 2019-09-30
Supplement: s1 [file s1]

**Figure S1**

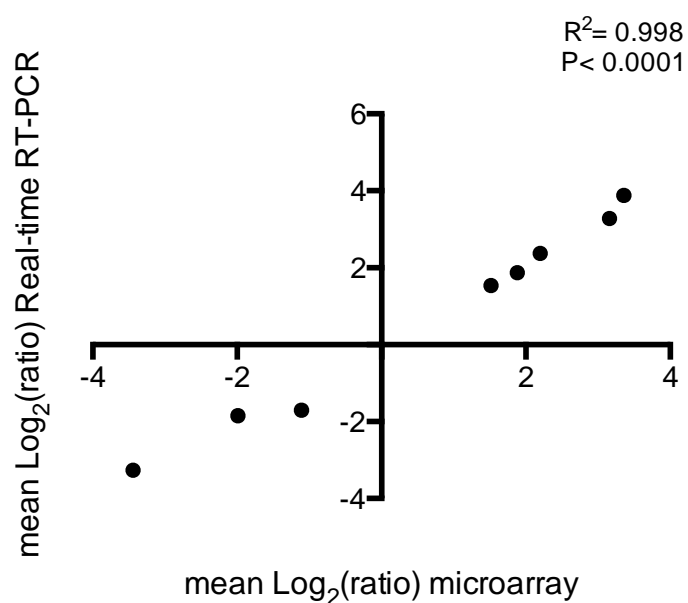

Correlation analysis of the mean  $\text{Log}_2(\text{ratio})$  values obtained by Real-time RT-PCR and microarray analyses. Real-time RT-PCR validation were carried out for 8 differentially expressed transcripts identified in the 4 comparison of root transcriptional profile obtained through microarray analysis. The mean values were calculated using the values obtained for the three biological replicates of each sample. Pearson correlation analysis was carried out using a 95% confidence interval using the GraphPad Prism software (version 6.0).

**Table S2**

|                      |                                  | <b>Lo5 1d vs 0d</b>  |                            | <b>Lo5 4d vs 0d</b>  |                            |
|----------------------|----------------------------------|----------------------|----------------------------|----------------------|----------------------------|
| <b>Transcript ID</b> | <b>Description</b>               | <b>FC microarray</b> | <b>FC Real-time RT-PCR</b> | <b>FC microarray</b> | <b>FC Real-time RT-PCR</b> |
| AC189750.4_FGT004    | APS reductase 3                  | -2.16                | -3.85 ± 0.94               |                      |                            |
| GRMZM2G010251_T01    | ZmNRT2.2                         |                      |                            | -10.85               | -11.36 ± 3.62              |
| GRMZM2G011598_T01    | NAC domain containing protein 47 |                      |                            | 3.68                 | 3.66 ± 1.77                |
| GRMZM2G036708_T01    | cysteine synthase C1             | 2.88                 | 2.91 ± 1.20                |                      |                            |
| GRMZM2G043193_T01    | ammonium transporter 2, ZmAMT3.3 |                      |                            | 4.60                 | 5.18 ± 1.20                |
|                      |                                  | <b>T250 1d vs 0d</b> |                            | <b>T250 4d vs 0d</b> |                            |
| <b>Transcript ID</b> | <b>Description</b>               | <b>FC microarray</b> | <b>FC RT-PCR</b>           | <b>FC microarray</b> | <b>FC RT-PCR</b>           |
| GRMZM2G044851_T01    | ZmNTR1.5                         | 8.94                 | 9.72 ± 1.47                |                      |                            |
| GRMZM2G044851_T01    | ZmNTR1.5                         |                      |                            | 10.27                | 14.70 ± 3.55               |
| GRMZM2G156599_T01    | YELLOW STRIPE like 3             |                      |                            | -3.97                | -4.19 ± 0.98               |

Results of Real-time RT-PCR analysis of a set of transcripts differentially expressed in Lo5 and T250 roots between different days of growth without N. Transcript ID, description, microarray fold change (FC) value and Real-time RT-PCR FC (means ± SE of three biological replicates) were reported.

**Table S4**

| ProbeName              | Transcript ID     | Description          | Forward primer               | Reverse primer                |
|------------------------|-------------------|----------------------|------------------------------|-------------------------------|
| CUST_38825_PI430257437 | AC189750.4_FGT004 | APS reductase 3      | 5'-CTCCAGTGAGCGAGAACCAT- 3'  | 5'-GTGTCAC TACCAAACCCAGT- 3'  |
| CUST_31215_PI430257437 | GRMZM2G010251_T01 | ZmNRT2.2             | 5'- ATGTTACCTGCTACCTACC-3'   | 5'- GAATATCGTTGGCACATCTC-3'   |
| CUST_21167_PI430257437 | GRMZM2G011598_T01 | NAC domain           | 5'-ATGGGCACGATGAACTGACA-3'   | 5'-GTGTGTGTTTGGTGCAATAGAT-3'  |
| CUST_33358_PI430257437 | GRMZM2G036708_T01 | Cysteine synthase C1 | 5'-CATTCCCCCCTCATCCAGTT-3'   | 5'-TCTCTCTTTCAACATTTTCCCAT-3' |
| CUST_25268_PI430257437 | GRMZM2G043193_T01 | ZmAMT3.1             | 5'-GTGCATTTGTTTGCTAATTGCT-3' | 5'-ATCCTGACACTCTACATTCCT-3'   |
| CUST_21617_PI430257437 | GRMZM2G044851_T01 | ZmNRT1.5             | 5'-GGCTTACGCATGACCATCA-3'    | 5'-CCTCCACCTCAAGAAGACAA-3'    |
| CUST_22506_PI430257437 | GRMZM2G156599_T01 | YELLOW STRIPE like   | 5'-GAGATACACTGAAGGCATCA-3'   | 5'-ACAAGGATAATACAGGGGACA-3'   |

Sequence of forward and reverse primers used in Real-time RT-PCR experiments. ProbeName, Transcript ID, Description and 5'-3' sequences of forward and reverse primers were reported for each transcript.
