# Supplementary material for: Nitrogen Starvation Differentially Influences Transcriptional and Uptake Rate Profiles in Roots of Two Maize Inbred Lines with Different NUE
Source: MDPI journal article supplement (doi:10.3390/ijms20194856), 2019-09-30
Supplement: s1 [file s1]

**Figure S1:** Correlation analysis of the mean Log<sub>2</sub>(ratio) values obtained by Real-time RT-PCR and microarray analyses.

**Table S1:** Differentially expressed transcripts identified by each comparison of transcriptional profiles (Lo5 1 d vs. od; Lo5 4 d vs. 0 d; T250 1 d vs. 0 d; T250 4 d vs. 0 d).

**Table S2:** Results of Real-time RT-PCR analysis of a set of transcripts differentially expressed in Lo5 and T250 roots between different days of growth without N.

**Table S3:** Transcripts specifically modulated in Lo5 and T250 lines at 1 and 4 d.

**Table S4:** Sequence of forward and reverse primers used in Real-time RT-PCR experiments.
